# Supplementary material for: Multi-omics analysis of the cervical epithelial integrity of women using depot medroxyprogesterone acetate
Source: PLoS Pathog. 2022 May 9;18(5):e1010494. doi: 10.1371/journal.ppat.1010494 (PMC9119532; doi:10.1371/journal.ppat.1010494)
Supplement: S1 Table — (XLSX) [file ppat.1010494.s006.xlsx]

## Sheet: S1 Table
S1 Table. Plasma levels of estradiol and progesterone at study visit.
Patient ID	Group	Estradiol (pg/ml)	Progesterone (ng/ml)
P001	Control	81.4492	0.0503145
P002	Control	284.391	0.0503145
P003	Control	21.7924	0.0503145
P004	Control	132.389	0.0503145
P005	Control	135.385	7.54717
P006	Control	175.429	0.116352
P008	Control	21.7924	0.0503145
P012	Control	73.0046	0.0503145
P014	Control	310.27	0.113208
P017	Control	60.7464	0.0503145
P018	Control	21.7924	0.0503145
P019	Control	81.7216	0.0503145
P020	Control	295.56	8.49057
P021	Control	289.567	0.091195
P022	Control	195.315	0.0503145
P024	Control	26.6957	0.0503145
P025	Control	108.69	10.3774
P026	Control	77.9079	1.91824
P027	Control	55.2983	0.0503145
P029	Control	92.6178	0.0503145
P031	Control	76.2735	0.0503145
P033	Control	211.387	5.34591
P034	Control	75.1839	0.0503145
P036	Control	23.6993	0.0503145
P039	Control	248.161	0.169811
P040	Control	116.862	0.0503145
P041	Control	120.131	0.0503145
P042	Control	43.5849	0.0503145
P043	Control	71.3702	0.0503145
P044	Control	241.896	0.157233
P045	Control	86.3525	3.01887
P046	Control	64.5601	0.0503145
P048	Control	148.461	18.8679
P050	Control	224.19	0.345912
P052	Control	57.4775	3.11321
P053	Control	57.7499	0.0503145
P057	Control	218.197	8.49057
P059	Control	52.8466	1.60377
P061	Control	38.4092	0.0503145
P062	Control	21.7924	0.0503145
P064	Control	219.286	0.254717
P065	Control	353.31	0.0503145
P066	Control	21.7924	0.0503145
P067	Control	45.2193	0.110063
P068	Control	35.9575	0.0503145
P069	Control	140.561	0.0503145
P070	Control	120.948	0.0503145
P071	Control	257.695	0.103774
P072	Control	21.7924	0.0503145
P073	Control	241.624	0.22327
P074	Control	166.712	0.974843
P075	Control	46.3089	0.0503145
P077	Control	151.185	1.32075
P078	Control	247.889	0.154088
P079	Control	81.7216	0.0503145
P080	Control	46.0365	0.0503145
P081	Control	26.9681	11.0063
P082	Control	101.607	0.0503145
P083	Control	91.2558	0.81761
P086	Control	94.2522	6.28931
P087	Control	405.339	0.122642
P105	Control	104.059	9.43396
P106	Control	208.935	8.1761
P117	Control	239.444	0.125786
P051	DMPA	43.3124	0.0503145
P063	DMPA	35.1403	0.0503145
P085	DMPA	21.7924	0.0503145
P088	DMPA	40.8608	0.0503145
P089	DMPA	21.7924	0.0503145
P090	DMPA	36.5023	0.0503145
P091	DMPA	40.316	0.0503145
P092	DMPA	21.7924	0.0503145
P093	DMPA	21.7924	0.0503145
P094	DMPA	21.7924	0.0503145
P095	DMPA	27.5129	0.091195
P096	DMPA	30.7818	0.0503145
P097	DMPA	21.7924	0.0503145
P098	DMPA	21.7924	0.0503145
P099	DMPA	21.7924	0.0503145
P100	DMPA	21.7924	0.0503145
P101	DMPA	68.3737	0.0503145
P102	DMPA	56.6603	0.0503145
P103	DMPA	21.7924	0.0503145
P107	DMPA	123.944	0.0503145
P108	DMPA	21.7924	0.0503145
P109	DMPA	91.5282	0.0503145
P110	DMPA	53.9363	0.0503145
P111	DMPA	21.7924	0.0503145
P112	DMPA	21.7924	0.0503145
P113	DMPA	30.7818	0.0503145
P114	DMPA	91.8006	0.0503145
P115	DMPA	21.7924	0.0503145
P116	DMPA	21.7924	0.0503145
P119	DMPA	21.7924	0.0503145
P120	DMPA	21.7924	0.0503145
P121	DMPA	NA	NA
NA: Not Available.
